RESEARCH ARTICLE

# SNPs in inflammatory genes *CCL11*, *CCL4* and *MEFV* in a fibromyalgia family study

Zhifang Zhang<sup>1</sup>, Jinong Feng<sup>1</sup>, Allen Mao<sup>1</sup>, Keith Le<sup>1</sup>, Deirdre La Placa<sup>1</sup>, Xiwei Wu<sup>2</sup>, Jeffrey Longmate<sup>3</sup>, Claudia Marek<sup>4</sup>, R. Paul St. Amand<sup>4</sup>, Susan L. Neuhausen<sup>5</sup>, John E. Shively<sup>1\*</sup>

**1** Department of Molecular Imaging and Therapy, Beckman Research Institute, City of Hope, Duarte, CA, United States of America, **2** Department of Molecular Medicine, Beckman Research Institute, City of Hope, Duarte, CA, United States of America, **3** Department of Biostatistics, Beckman Research Institute, City of Hope, Duarte, CA, United States of America, **4** R.P. St. Amand MD Inc, Marina Del Rey, CA, United States of America, **5** Department of Population Sciences, Beckman Research Institute, City of Hope, Duarte, CA, United States of America

✉ These authors contributed equally to this work.

\* [jshively@coh.org](mailto:jshively@coh.org)

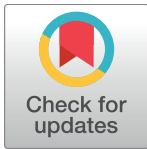

**OPEN ACCESS**

**Citation:** Zhang Z, Feng J, Mao A, Le K, La Placa D, Wu X, et al. (2018) SNPs in inflammatory genes *CCL11*, *CCL4* and *MEFV* in a fibromyalgia family study. PLoS ONE 13(6): e0198625. <https://doi.org/10.1371/journal.pone.0198625>

**Editor:** Srinivas Mummidi, University of Texas Rio Grande Valley, UNITED STATES

**Received:** January 21, 2018

**Accepted:** May 22, 2018

**Published:** June 21, 2018

**Copyright:** © 2018 Zhang et al. This is an open access article distributed under the terms of the [Creative Commons Attribution License](https://creativecommons.org/licenses/by/4.0/), which permits unrestricted use, distribution, and reproduction in any medium, provided the original author and source are credited.

**Data Availability Statement:** All relevant data are within the paper and supporting information files.

**Funding:** Los Angeles Fibromyalgia Foundation. This work was supported in part from donations from patients with fibromyalgia. The funders had no role in the study design, data collection and analysis, decision to publish, or preparation of the manuscript. R.P. St. Amand MD Inc. provided support in the form of salaries for authors CM and RPSA, but did not have any additional role in the study design, data collection and analysis, decision to publish, or preparation of the manuscript. The

## Abstract

### Background

Fibromyalgia (FM) is a chronic pain syndrome with a high incidence in females that may involve activation of the immune system. We performed exome sequencing on chemokine genes in a region of chromosome 17 identified in a genome-wide family association study.

### Methods and findings

Exome sequence analysis of 100 FM probands was performed at 17p13.3-q25 followed by functional analysis of SNPs found in the chemokine gene locus. Missense SNPs (413) in 17p13.3-q25 were observed in at least 10 probands. SNPs rs1129844 in *CCL11* and rs1719152 in *CCL4* were associated with elevated plasma chemokine levels in FM. In a transmission disequilibrium test (TDT), rs1129844 was unequally transmitted from parents to their affected children ( $p < 0.0074$ ), while the *CCL4* SNP was not. The amino acid change (Ala23Thr), resulting from rs1129844 in *CCL11*, predicted to alter processing of the signal peptide, led to reduced expression of CCL11. The variant protein from *CCL4* rs1719152 exhibited protein aggregation and a potent down-regulation of its cognate receptor CCR5, a receptor associated with hypotensive effects. Treatment of skeletal muscle cells with CCL11 produced high levels of CCL4 suggesting CCL11 regulates CCL4 in muscle. The immune association of FM with SNPs in *MEFV*, a chromosome 16 gene associated with recurrent fevers, had a  $p < 0.008$  TDT for a combined 220 trios.

### Conclusions

SNPs with significant TDTs were found in 36% of the cohort for *CCL11* and 12% for *MEFV*, along with a protein variant in *CCL4* (41%) that affects CCR5 down-regulation, supporting an immune involvement for FM.

specific roles of these authors are articulated in the 'author contributions' section.

**Competing interests:** We have the following interests. Claudia Marek and R. Paul St. Amand are employed by R.P. St. Amand MD Inc. There are no patents, products in development or marketed products to declare. This does not alter our adherence to all the PLOS ONE policies on sharing data and materials, as detailed online in the guide for authors.

## Introduction

Fibromyalgia (FM) is a pain-associated syndrome affecting the musculoskeletal system in 2–5% of the general population [1, 2]. Besides wide-spread pain in all four quadrants of the body, the majority of patients suffer from sleep disorder, mental fog, and irritable bowel syndrome [3, 4]. Family studies have established a genetic basis for the syndrome [5], including a genome-wide association (GWAS) study [6] that identified a region of chromosome 17 (17p11.2–q11.2) containing a chemokine-gene-cluster locus. A recent study examined gene expression profiles in peripheral blood defining a ten-gene signature of which several fit an inflammatory pathway [7]. While several single-nucleotide polymorphisms (SNPs) in pain-related genes were examined as the presumptive cause of FM [7–11], we [12, 13] and others [14], have proposed that the preponderance of the syndrome in females, as high as 85% [1], and the association of FM with symptoms such as muscle aches, sleep disorder and irritable bowel, suggests the syndrome may have an immune component. In a previous study [12], we showed that several inflammatory chemokines were elevated in FM, including CCL11 and CCL4, genes located in a chemokine gene cluster on chromosome 17. This chemokine locus is associated with atopic dermatitis [15] and IBD [16], both immune-related disorders. As a follow-up to the GWAS FM family study on chromosome 17 [6], we performed functional studies on the chemokine gene-cluster region on chromosome 17 by exome sequence and functional analyses.

Since chronic elevation of these chemokines may exhibit a fever-like state with FM symptomatology (muscle pain, etc.), we also analyzed SNPs on *MEFV*, a gene in which SNPs are associated with recurrent fevers and the activation of IL-1 $\beta$  in the inflammasome [17]. Since we had previously shown that 15% of FM patients in a cohort of 100 trios had a significant association with SNPs in *MEFV* [13], our new cohort of 120 trios allowed us to validate the results of the previous study and to perform analysis on the combined cohorts of 220 trios. The results show that in 12% of the combined cohorts, *MEFV* SNPs are associated with FM. In a separate study of 187 Turkish patients, Karakus also found a significant association of FM with *MEFV* SNPs [18]. Given that 12% of our cohort had an association with SNPs in *MEFV* and 36.8% with SNPs in CCL11, our results suggest that polymorphisms of the immune system may play a causative role in a substantial number of FM patients.

## Materials and methods

### Materials

Recombinant human CCL3 (MIP-1 $\alpha$ ), CCL4 (MIP-1 $\beta$ ), CCL11 (Eotaxin), CCL1 (MCP-1), IL-13, GM-CSF, IL-4, and IFN $\gamma$  were obtained from ProSpec Protein-Specialists (East Brunswick, NJ, USA); LPS from *E. coli* (055:B5) were purchased from Sigma-Aldrich (St. Louis, MO, USA); recombinant human CCL4 variant (S80T) was from Kingfisher Biotech, Inc (St Paul, MN, USA); anti-human CCR5-PE (CD195, Clone# J418F1), anti-human CCR1-APC (CD191, Clone# 5F10B29), anti-human CD4-PerCP (Clone# OKT4) and anti-human CD3-FITC (clone# SK7) were from Biolegend (San Diego, CA, USA); Indo-1-AM was from Molecular Probes (Eugene, OR).

### Participants

This study was approved by the Institutional Review Board of City of Hope National Medical Center (IRB 04186). A total of 220 patients with fibromyalgia and their parents were recruited into the study. Written informed consents were obtained from participants, or in the case of minors, their parents. Patients were diagnosed using American College of Rheumatology

criteria [19] including musculoskeletal pain that exists for over three months, associated with fatigue, depression, cognitive difficulty and irritable bowel. Patients with rheumatoid arthritis and systemic lupus erythematosus were excluded from the study; clinical characteristics of the patient population have been previously described [13]. Unrelated, gender and age- matched control subjects were used for comparison of cytokine/chemokine levels.

### Exome sequencing

Genomic DNA from peripheral blood lymphocytes or saliva was sonicated to produce fragment sizes of 200–250 bp and Illumina adapters were ligated to generate the libraries. Each library was hybridized to biotinylated cRNA oligonucleotide baits from the SureSelect Human All Exon kit (Agilent Technologies), purified by streptavidin-bound magnetic beads, and amplified for 12 cycles. Paired-end (80 × 80 bp) sequencing was conducted using an Illumina Genome Analyzer IIX or HiSeq 2000 (Illumina Inc.). The exome probes covered 50 Mb of the human genome, corresponding to the exons and flanking intronic regions of all genes in the National Center for Biotechnology Information Consensus CDS database (accession no. SRA072282).

### PCR and amplicon sequencing

DNA was isolated from peripheral leukocytes or saliva, using the QIAamp DNA Blood Mini Kit (Qiagen) and Oragene DNA Self Collection Kits (DNA Genotek) according to the manufacturers' instructions. The coding exons with known SNPs from deep sequencing were amplified by PCR in a total volume of 20 µl with 10 mM Tris-HCl, pH 8.3, 50 mM KCl, 1.5 mM MgCl<sub>2</sub>, 200 µM of dNTPs, and 0.2 µM of primers. 1 U of Ampli-Taq Gold (Roche) and 20 ng of genomic DNA were added. PCR reactions were performed on the GeneAmp PCR System 9700 (Applied Biosystems) with denaturation at 94°C for 10 min, and then denaturation at 94°C for 15 sec, annealing at 60°C for 30 sec, and elongation at 72°C for 1 min for a total of 35 cycles and a final elongation for 10 min at 72°C. The amplicons were purified by ExoSAP-IT and sequenced with the ABI PRISM 3730 (Applied Biosystems). The sequences of PCR primers are available upon request. Genomic and amino acid sequences for candidate genes were collected from Ensemble.

### Transient expression of WT and varCCL11

Expi 293F™ cells, ExpiFectamine 293 transfection kit, Expi 293 expression medium, and OptiMEM reduced serum medium were purchased from Life Technologies Corporation (Carlsbad, CA). The expression vector containing WT CCL11 human cDNA ORF clone and anti-DDk monoclonal antibody (Clone 4C5) were purchased from OriGene Technologies, Inc (Rockville, MD). VarCCL11 (Ala23Thr) was generated using QuikChange Lightning Multi Site-Directed Mutagenesis Kit (Agilent Technologies, Carpinteria, CA) and confirmed by sequence analysis. Expi 293 transfections were performed according to the manufacturer's protocol. Briefly, ExpiFectamine 293 transfection reagent and plasmid DNA were separately diluted in OptiMEM complexation medium. Following a 5-minute incubation, ExpiFectamine 293 and DNA mixtures were combined and incubated for an additional 20 min. The ExpiFectamine 293-DNA-OptiMEM mixture was then added to cells. Enhancer 1 and Enhancer 2 were added to transfected cultures 16 hours after transfection. Supernatants were harvested from transiently transfected Expi 293F cell culture at day 7, sterile filtered and analyzed by SDS gel electrophoresis on a 12% polyacrylamide gel and visualized with Coomassie brilliant blue. CCL11 concentration in the supernatant was measured using human CCL11 ELISA kit (Aviva Systems Biology Corp).

## Functional studies

Chemokine and cytokine levels were compared in unrelated healthy controls and FM cases with wild type or variant alleles using the Luminex 100/200 system. Peripheral blood mononuclear cells (PBMCs) were isolated from citrated blood of healthy donors by Ficoll-Hypaque (Pharmacia Biotech, Uppsala, Sweden) density gradient centrifugation as recommended by the manufacturer. Monocytes were collected and separated from PBMCs using EasySep™ Human Monocyte Enrichment Kit (StemCell Technologies, Vancouver, BC, Canada). The purity of monocytes were stained with anti-CD14-FITC and checked by using flow cytometry FACSCanto II (BD Biosciences, San Jose, CA). Cells were suspended in RPMI 1640 supplemented with 100 U/mL penicillin, 100 mg/mL streptomycin, 1 mM L-glutamine and 10% FBS with cells concentration  $1 \times 10^6$ /mL. For monocyte-derived immature dendritic cell differentiation, monocytes were treated with 1,000 U/mL GM-CSF and 500 units/mL IL-4 for two days. The human CEM.NKR CCR5 T-cell line were kindly provided from Dr. John Burnett's lab at City of Hope and grown in RPMI1640 with 10% FBS, 2 mM L-glutamine and antibiotics at 5% CO<sub>2</sub>, 37°C. Myoblast and skeletal muscle cell medium BulletKit® (containing skeletal muscle cell basal medium, EGF, insulin, dexamethasone, Gentamicin sulfate, Amphotericin-B, and Bovine serum albumin) were purchased from Cambrex Bio Science Walkersville, Inc. Cells were seeded in 24-well plates at 10,000 cells/cm<sup>2</sup>, grown to confluency, treated with LPS, MCP-1, Eotaxin, IL-13, or IFN $\gamma$  for 48 h, and supernatants were harvested for cytokine multiplex analysis. One-way MLR was carried out by co-culturing  $1 \times 10^6$ /mL PBL (responder cells) and  $1 \times 10^6$ /mL irradiated allogeneic PBL (stimulator cells, 900 cGy) in the T-125-cm<sup>2</sup> tissue culture flask for 9 days. T cell surface CCR5 expression was detected by using flow cytometry. Eosinophils were isolated using EasySep™ Human Eosinophil Enrichment Kit (StemCell Technologies, Vancouver, BC, Canada). The purity of eosinophils was >90% assessed by anti-human CCR3-APC antibody and anti-human CD16-PerCP antibody (Biolegend, San Diego). Eosinophils were treated with commercial CCL11 (Biolegend, San Diego), expressed WT CCL11, or varCCL11 for 2 hours and CCR3 down-regulation was analyzed using anti-human CCR3 antibody, Canton II Flow cytometry and Flowjo software.

## Calcium mobilization assay

Immature DCs, CEM.NKR CCR5 T-cell line and 9-day one-way MLR cells at  $10^7$ /mL were loaded with 5 $\mu$ M Indo-1-AM for 7 min at 37°C and kept at room temperature for an additional 10 min. Cells were washed with a 5-fold excess of cold PBS and centrifuged at  $200 \times g$  for 10 min at 4°C. Flow cytometric measurements of intracellular Ca<sup>2+</sup> was performed using a BD LSRFortessa™ (BD Biosciences, San Jose, CA, USA). Samples were excited at 351 nm and emission fluorescence was recorded at both 405/20 and 485/20 nm for Indo-1 AM. FACS analyses were performed on suspensions of  $2 \times 10^6$  cells/mL in PBS with calcium and magnesium. Base-line fluorescence was determined and cells were then stimulated with CCL4 (20 ng/mL), variant CCL4 (20 ng/mL) and ionomycin (1  $\mu$ M) were added to suspended cells and monitored as described. The ratio of 405:485 nm was detected as intracellular calcium mobilization ([Ca<sup>2+</sup>]<sub>i</sub>).

## Mass spectrometry and size exclusion chromatography (SEC)

The molecular sizes of CCL11, varCCL11, CCL4 and variant CCL4 were determined by electrospray ionization mass spectrometry on an Orbitrap Fusion mass spectrometer (Thermo Scientific). Size exclusion chromatography was performed on a Superdex 200 10/30 column (GE Healthcare Life Sciences) run at 0.5 mL/min in PBS. UV detection was performed at 214 and 280nm on a GE Akta Purifier HPLC.

## Statistical analysis

Assay results were means  $\pm$  standard deviation (SD) or  $\pm$  standard error (SE). Student's t tests were used for comparisons of chemokine levels (P values were unpaired, two-sided). Statistical significance in the text refers to  $p < 0.05$  for cytokine data, and transmission disequilibrium tests (TDTs), and  $p < 0.0125$  for the four new TDTs of chemokine genes. The exact version of the TDT for MEFV was previously described (17).

## Results

### Identification of a *CCL11* variant as a possible marker of FM

Since FM occurs in families, there are likely susceptibility genes. Although several studies based on candidate gene hypotheses have identified associated SNPs, their functional significance has not been studied. Recently, a GWAS study of 116 FM families identified association with a locus at chromosome 17p11.2–q11.2 [6]; however, no candidate gene(s) emerged from that study. As a first approach to identify the candidate gene(s), we conducted exome sequencing of an expanded region of chromosome 17 (17p13.3–q25) from 100 probands with FM, and identified 4332 SNPs that were also found in the ExAc data base. To reduce the number of SNPs for analysis, we selected only SNPs occurring in at least 10% of the 100 FM probands, twice the higher end of the estimated frequency of 2 to 5% of FM in the general population. Four hundred and thirteen SNPs met these criteria (S1 Table). Based on the hypothesis that FM has an immune component, we further selected only those SNPs found in the chromosome 17 cluster of 18 chemokine genes [20]. Based on these criteria, only four SNPs in four chemokine genes (CCL11, CCL8, CCL23 and CCL4) were further studied (Table 1, upper panel). The allele frequencies of these four SNPs were similar to the ExAC database, with sequencing data from over 60,000 unrelated individuals [21] (Table 1, middle panel). An example of sequencing data for CCL11 is shown in S1 Fig. Since the incidence of FM is common in the general population and its occurrence is associated with an environmental trigger such as trauma [22] or a chronic inflammatory condition such as IBS [4], the similar allele frequency in the general population was not surprising. This is similar to the 1% incidence of celiac disease, where 95% express HLA-DQ2 that occurs in 25% of the Caucasian population [23], suggesting that a genotype alone is necessary but not sufficient for development of a disease.

Using the transmission disequilibrium test (TDT), we analyzed the transmission of the four SNPs from parents to probands. Of the four SNPs, only rs1129844 of *CCL11* was significant ( $p = 0.0074$ ) (Table 1, lower panel). Out of 220 FM cases in our combined cohorts, 72 were heterozygous and 9 were homozygous for G>A (rs1129844), with a minor allele frequency (MAF) of 19.58% compared to the ExAC database reported frequency of 18.32%. Overall, 36.8% of the 220 patients had at least one copy of this SNP.

The predicted amino acid change (Ala23Thr) for *CCL11* rs1129844 is potentially important, since this is the exact position at which the signal peptidase cleaves pre-CCL11 to generate mature CCL11 during processing in the endoplasmic reticulum (ER). In other proteins where a similar mutational position is observed, the protein is often not expressed [24, 25]. To examine the effect of this SNP, we expressed plasmids containing wild type or varCCL11 in HEK cells and analyzed the supernatants for CCL11 expression (Fig 1A and 1B). We observed that the mutation affected both the intrinsic expression levels and activity of varCCL11. Analysis of the expressed product by mass spectrometry (data not shown) revealed altered processing to position +2 and confirmed the presence of O-glycosylation as previously shown by Noso et al. [26]. The supernatant levels of CCL11 in unstimulated monocytes from heterozygous controls



**Table 1. SNPs of immune related genes in chromosome 17 from FM cohorts and transmission analysis from FM trios<sup>1,2,3</sup>.**

| Gene         | AA Change         | AA Pos | FM Patients |        |                 |            | MAF           | ExAc Freq     |
|--------------|-------------------|--------|-------------|--------|-----------------|------------|---------------|---------------|
|              |                   |        | Ref Allele  | Hetero | Homo            | Var Allele |               |               |
| <i>CCL11</i> | Ala>Thr           | 23     | 65          | 29     | 6               | 41         | 20.50%        | 18.32%        |
| <i>CCL8</i>  | Lys>Gln           | 69     | 76          | 22     | 2               | 26         | 13.00%        | 15.51%        |
| <i>CCL23</i> | <b>Val&gt;Met</b> | 123    | 4           | 26     | 70              | 166        | <b>83.00%</b> | <b>81.03%</b> |
| <i>CCL4</i>  | Ser>Thr           | 80     | 53          | 41     | 6               | 53         | 26.50%        | 23.22%        |
|              |                   |        |             |        |                 |            |               |               |
|              |                   |        | Ref Allele  | Hetero | Homo            | Var allele | MAF           | ExAc Freq     |
| <i>CCL11</i> | Ala>Thr           | 23     | 139         | 72     | 9               | 90         | 20.45%        | 18.32%        |
| <i>CCL8</i>  | Lys>Gln           | 69     | 86          | 30     | 4               | 38         | 15.83%        | 15.31%        |
| <i>CCL23</i> | <b>Met&gt;Val</b> | 123    | 80          | 33     | 7               | 47         | <b>19.58%</b> | <b>18.97%</b> |
| <i>CCL4</i>  | Ser>Thr           | 80     | 129         | 88     | 9               | 105        | 24.09%        | 23.22%        |
|              |                   |        |             |        |                 |            |               |               |
|              |                   |        | Transmitted |        | Not Transmitted |            | P value       |               |
| <i>CCL11</i> | Ala>Thr           | 23     | 81          |        | 52              |            | 0.0074        |               |
| <i>CCL8</i>  | Lys>Gln           | 69     | 33          |        | 37              |            | NS            |               |
| <i>CCL23</i> | Met>Val           | 123    | 42          |        | 36              |            | NS            |               |
| <i>CCL4</i>  | Ser>Thr           | 80     | 80          |        | 77              |            | NS            |               |

<sup>1</sup> Upper: raw Illumina sequencing data of 100 FM patients taken from [S1 Table](#). MAF = minor allele frequency. Note: for CCL23 in the ExAc dbase Val>Met is reported as the MAF (bold type), but should be Met>Val. This discrepancy is corrected in the validation section (Middle). NS, not significant.

<sup>2</sup> Middle: validated data by direct sequencing of 220 FM samples for CCL11 and CCL4, and 120 FM samples for CCL8 and CCL23. The corrected minor allele for CCL11 (Val) and the MAF are shown in bold.

<sup>3</sup> Lower: transmission analysis includes 220 trios for CCL11 and CCL4, and 120 trios for CCL8 and CCL23. P-values are one-sided on the presumption that the variant allele confers higher risk of FM.

<https://doi.org/10.1371/journal.pone.0198625.t001>

were lower than that from homozygous WT controls ([Fig 1C](#),  $p < 0.026$ ), suggesting that even one variant allele leads to lower CCL11 production. However, both WT and varCCL11 down regulate CCR3 on eosinophils ([Fig 1D](#)), demonstrating equivalent function in eosinophils, the major target of CCL11. Thus, the variant allele may function to limit the amount of CCL11 that can be produced.

Given the report that SNP rs111568837 in the promoter of *CCL11* correlated with the incidence of atopic dermatitis in an Italian cohort [[15](#)], we investigated whether rs111568837 also was associated with FM. However, the transmission of this SNP from parents to probands was not statistically significant ([S2 Table](#)). Interestingly, the *CCL11* coding SNP rs1129844 that was significant in our cohort was not statistically significant in the Italian atopic dermatitis cohort.

Since we previously found significantly high expression of CCL11 in FM patients [[12](#)], we re-examined their expression levels based on their *CCL11* genotype ([Fig 2A](#)). As expected, probands with WT CCL11 had high average expression ( $p < 0.001$  vs controls), while those with varCCL11 had a distribution not statistically distinguishable from WT probands or controls. Thus, CCL11 expression is associated with FM, resulting in high levels in those with wild type alleles, but less so in those with varCCL11, likely due to a functional defect in expression. The overall high expression of CCL11 in FM patients may be interpreted as causal or compensatory. Causal would predict that CCL11 associated SNPs would lead to higher levels of CCL11. However, given that the CCL11 SNP identified is associated with lower levels of CCL11, a compensatory mechanism is also possible, in that patients with this SNP would be predicted to not adequately raise their levels of CCL11 in response to an as yet unknown trigger of the

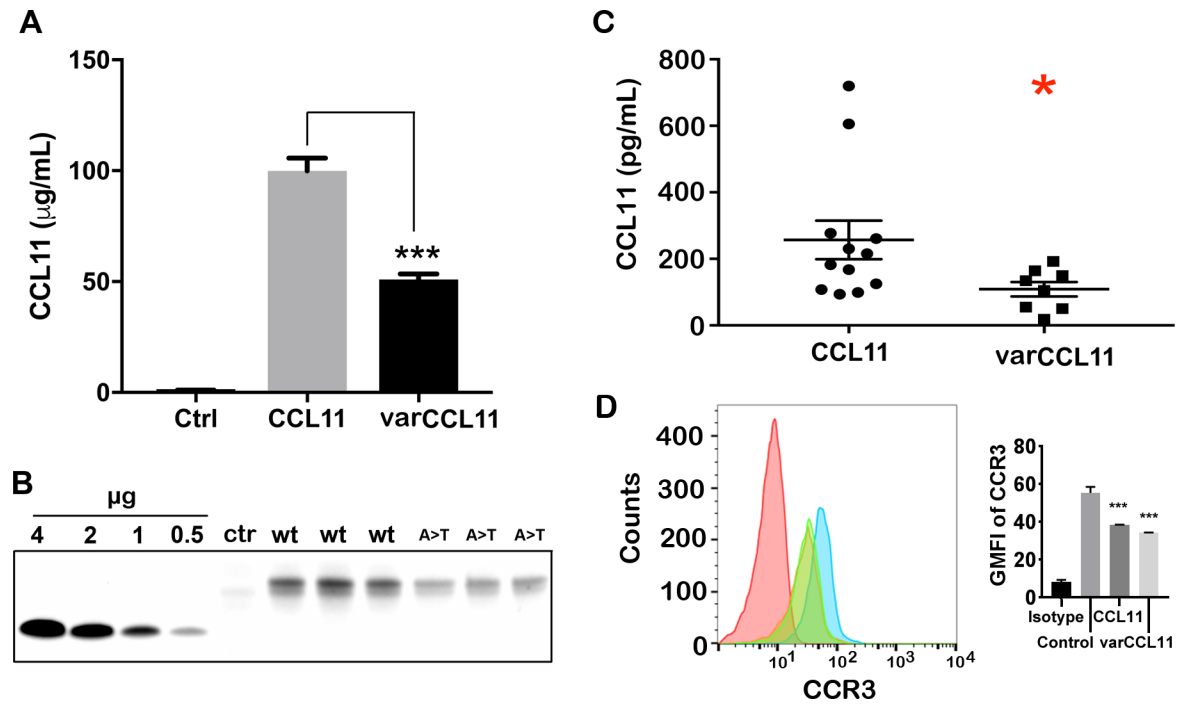

**Fig 1. Expression of wild type and variant (Ala23Thr) CCL11.** Plasmids encoding the genes for wild type and variant (Ala23Thr) CCL11 were expressed in HEK cells and the expression levels determined by (A) EIA (triplicates; \*\*\*,  $p < 0.001$ ) and (B) Coomassie Blue staining (triplicates). Control media (A: Ctrl) had undetectable levels of CCL11. Recombinant CCL11 standards (B: left) were used to quantitate protein expression of wild type (WT) and variant (A>T) CCL11 (B: right). Control media (Ctr) had  $< 0.05 \mu\text{g}$  expression of CCL11. The difference in migration of recombinant standards vs expressed protein on SDS gel electrophoresis is due to glycosylation (confirmed by mass spectrometry, data not shown). C: Control monocytes expressing either wild type ( $n = 12$ ) or varCCL11 (heterozygous,  $n = 8$ ) were incubated in media for 18 hrs and CCL11 levels were measured (\*,  $p < 0.026$ ). D: Eosinophils isolated from a donor were stained for CCR3 expression before (blue) or after incubation with equal amounts of WT (green) or varCCL11 (orange). The green and orange plots are identical. Isotype control (red).

<https://doi.org/10.1371/journal.pone.0198625.g001>

syndrome. If low expression of CCL11 in patients with varCCL11 can be verified in a larger study and/or shown to be associated with eosinophils, the primary cellular target of CCL11, this would provide further evidence that CCL11 production is a compensatory rather than a casual mechanism in FM.

Since CCL4 expression is also high in FM patients, further analysis revealed that the levels of CCL4 but not the related chemokine CCL3 were decreased in those with varCCL11 compared

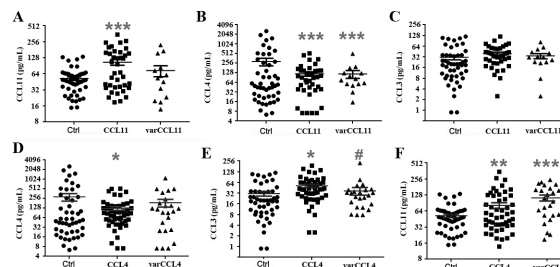

**Fig 2. Plasma levels of CCL11, CCL4 and CCL3 in female FM patients with varCCL11 or varCCL4.** A-C, CCL11, CCL4, and CCL3 levels in female healthy controls (Ctrl,  $n = 48$ ) vs female FM patients with wild type CCL11 ( $n = 19$ ) or var CCL11 ( $n = 14$ ). D-F, CCL4, CCL3 and CCL11 levels in female healthy controls (Ctrl,  $n = 48$ ) vs wild type CCL4 ( $n = 49$ ) or varCCL4 ( $n = 24$ ) in female FM patients. (\*  $P < 0.05$ , \*\*  $P < 0.01$ , \*\*\*  $P < 0.001$  in comparison with female healthy controls; #  $P < 0.05$  in comparison with female FM patients with wild type CCL4).

<https://doi.org/10.1371/journal.pone.0198625.g002>

to controls, suggesting CCL11 and CCL4 are both involved in FM (Fig 2B and 2C). These data suggest that CCL11 SNPs that lead to lower levels of CCL11 also affect the production of CCL4. If verified in larger studies, then CCL4 may also be produced as a compensatory mechanism in FM and depend on CCL11 production.

### Identification of a CCL4 variant as a possible marker of fibromyalgia

Although the CCL4 SNP examined in Table 1 was not significant by TDT, given the report that the peripheral CCL4-CCR5 axis contributes to neuropathic pain [27] suggesting a possible connection to the widespread pain experienced in FM, we performed functional analyses on this SNP. In addition to widespread pain, many FM patients exhibit orthostatic hypotension as a symptom [28], another possible connection to the CCL4-CCR5 axis, since Maraviroc, a CCR5 antagonist for the treatment of HIV causes hypotension as a side effect [29]. We tested whether the conservative amino acid change (Ser80Thr) in the varCCL4 could result in a functional change in the protein. Notably, closely related CCL3 and its variants differ in their dimer vs aggregation states [30] when they form homodimers with themselves or heterodimers with CCL4 [31]. To determine if a similar situation occurred with CCL4 or varCCL4, we determined their molecular sizes. The wild-type protein behaves as a relatively sharply migrating homodimer at a molecular size of 16 kDa (S2A Fig), whereas the variant migrates as two broad peaks, one at high molecular weight (>300 kDa) and the other at 16 kDa (S2B Fig). Thus, there is evidence that the variant exists as a high molecular weight aggregate that slowly reverts to a dimer upon dilution. It is likely that the aggregation state of the variant occurs during the secretion process from cells where protein concentrations are high, and slowly reverts to dimers upon dilution into circulation.

Due to the possible aggregation effects for the CCL4 variant, we analyzed the plasma levels of several cytokines and chemokines in FM cases with wild type and varCCL4 compared to healthy controls. VarCCL4 significantly affected the FM plasma levels of CCL4 compared to controls (Fig 2D and 2E). In addition, CCL11 levels were higher in wild type CCL4 and even higher in varCCL4 compared to controls (Fig 2F). These results further suggest a possible relationship between the two chemokines and their variants.

Since the preferential target of CCL4 is CCR5-positive cells, including immature dendritic cells and activated T-cells [32], we tested the functional activity of the wild type vs varCCL4 proteins in a variety of assays. Both were able to induce a Ca<sup>2+</sup> signal, a characteristic of CCR5 binding, and were able to block each other on sequential administration on immature dendritic cells (Fig 3A) and on a CCR5 positive T-cell line (Fig 3B). The slight difference of amplitude in Ca<sup>2+</sup> signals between CCL4 and varCCL4 may suggest the variant is less potent than the WT allele. However, given the high sensitivity of this assay, both were tested in the ng/mL range where they exist mainly as dimers, making it difficult to judge the effect of aggregated varCCL4. Since a hallmark of chemokine binding to their receptors is down-regulation of the cognate receptor, we performed surface staining of CCR5<sup>+</sup> cells before and after treatment with wild type and varCCL4. An equivalent amount of varCCL4 induced higher down-regulation of CCR5 in immature dendritic cells (Fig 3C) or in a CCR5 positive T-cell line (Fig 3D) than wild type CCL4. VarCCL4 also was more potent in the down-regulation of CCR5 in a mixed lymphocyte reaction (MLR), a case in which CCR5 is naturally expressed on activated T-cells (Fig 4). Although varCCL4 has a more potent effect on CCR5 down regulation than wild type CCL4, this effect may not be strictly related to aggregation, since the aggregation occurs at higher than physiological concentrations. We speculate that varCCL4 may cause an effect similar to the hypotension side effect caused by Malaviroc.

Although many types of cells secrete CCL4 when stimulated by other cytokines or chemokines, of primary interest is the production of CCL4 by skeletal muscle cells, the main target of



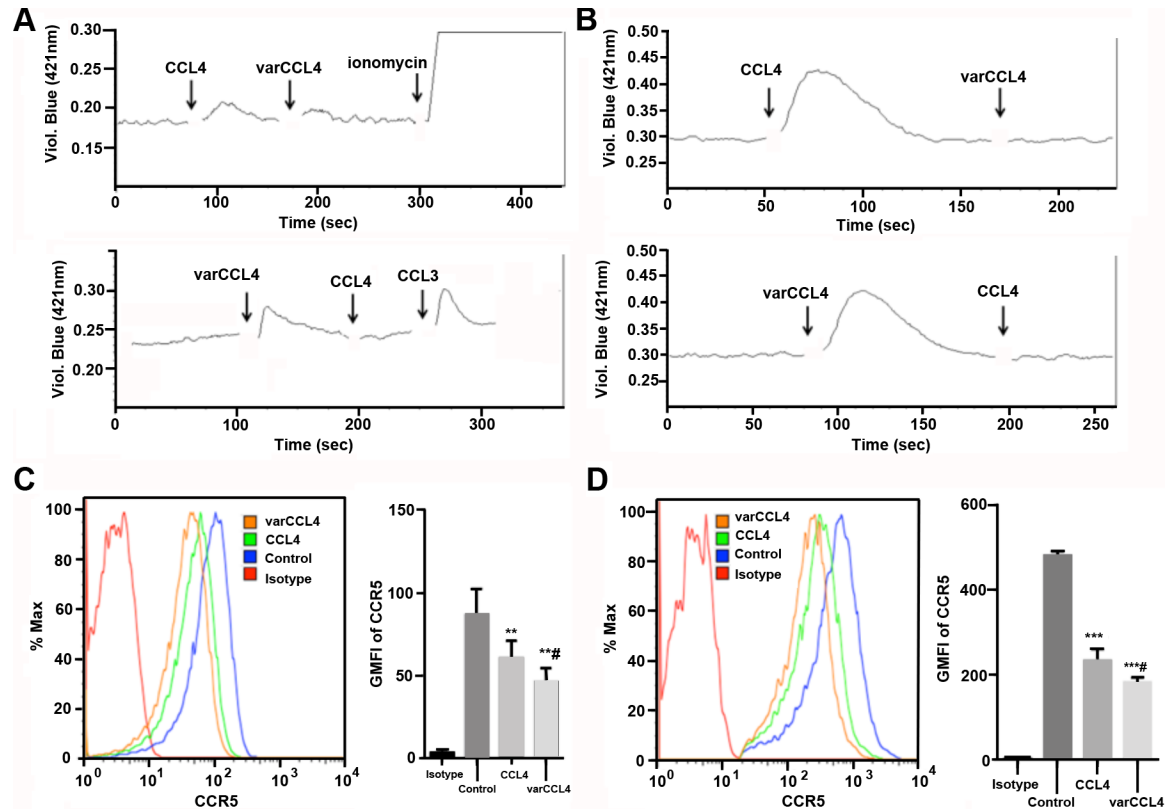

**Fig 3. Functional analyses of WT vs varCCL4 in immature dendritic cells or CEM.NK<sup>R</sup> CCR5 T-cells.** A-B. WT CCL4 and varCCL4 both stimulate and cross-block calcium mobilization in CCR5 positive immature dendritic cell (A) or CEM.NK<sup>R</sup> CCR5 T-cells (B). Ionomycin and CCL3 were used as positive controls. C-D. varCCL4 induces greater down-regulation of cell surface CCR5 than WT CCL4 on immature dendritic cells (C) and CEM.NK<sup>R</sup> CCR5 T-cell line (D). Cells were treated with 80 ng/mL of each CCL4 species for 3 hours, surface CCR5 was stained with anti-CCR5 antibody and analyzed by flow cytometry (\*\* P<0.01, \*\*\* P<0.001 in comparison with untreated control; # P<0.05 in comparison with WT CCL4).

<https://doi.org/10.1371/journal.pone.0198625.g003>

inflammation and pain in FM. When skeletal muscle cells were treated with a variety of inflammatory agents (including LPS and CCL11), the highest levels of CCL4 were induced by CCL11 (Fig 5). For comparative purposes, we also measured secretion of CCL3 and CCL5, chemokines that also bind to CCR5, from stimulated muscle cells. The results demonstrate that CCL4 levels were at least two-fold higher than either CCL3 or CCL5, emphasizing a predominant role for CCL4 in the skeletal muscle test. As previously reported by us [12], skeletal muscle cells respond to cytokine and/or chemokine stimulation by secreting their own effectors. It is possible that the production of CCL11 caused by inflammation in various sites throughout the body, may in turn, induce secretion of CCL4 in skeletal muscle, that amplify and/or prolong an inflammatory response, leading to chronic production.

### Confirmation of MEFV SNPs associated with FM

As mentioned in the Introduction, multiple SNPs in MEFV are associated with activation of the inflammasome and associated with recurrent fevers [33] via pyrin, the gene product of MEFV. MEFV variants were previously analyzed by us in 100 FM trios [13]. Although MEFV is located on chromosome 16, its association with the genetics of FM with the immune system

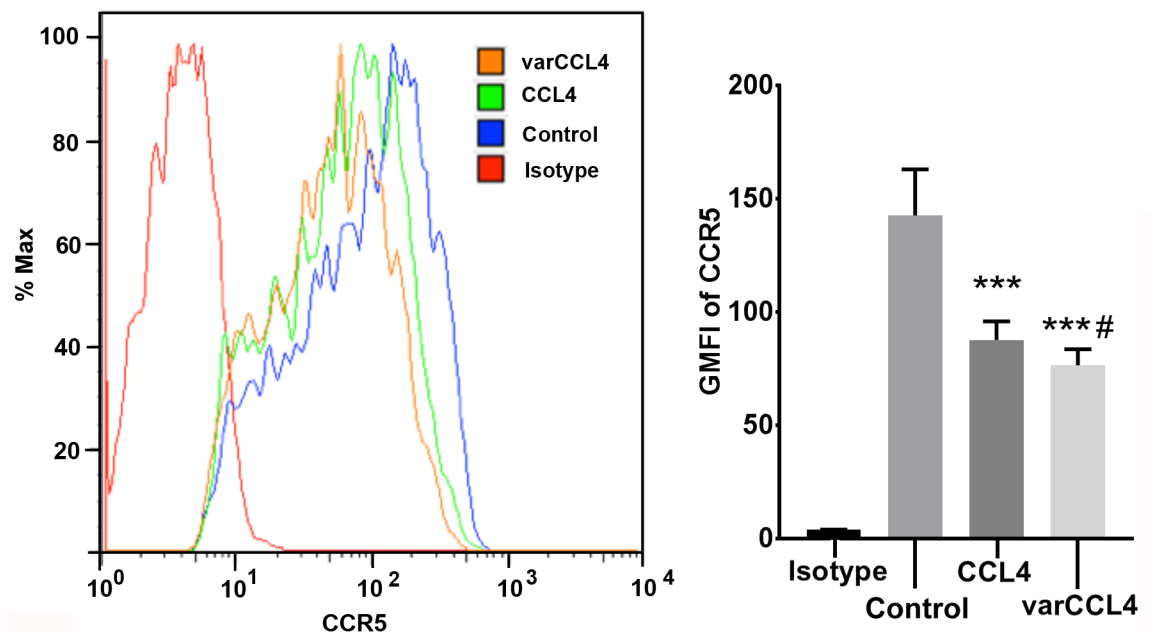

**Fig 4. Wild type versus varCCL4 in the down-regulation of CCR5 in a 9 day mixed lymphocyte culture.** Purified CD4 T-cells from mismatched donors were co-incubated for nine days and treated with WT or varCCL4 (50ng/mL) for 3 hours, surface stained with anti-CCR5 antibody and analyzed by flow cytometry (\*\*  $P < 0.01$ , \*\*\*  $P < 0.001$  in comparison with untreated control; #  $P < 0.05$  in comparison with WT CCL4).

<https://doi.org/10.1371/journal.pone.0198625.g004>

supports our immune role hypothesis. We found multiple variants that collectively had significant transmission bias ( $p = 0.0085$ ), indicating a positive association between FM and variants in *MEFV*. Since variants of *MEFV* may directly affect the inflammasome [17], this analysis provides evidence for a role of the immune system in the etiology of FM. With the addition of 120 new trios, we were able to validate the association of *MEFV* variants with FM in this second cohort. We found a total of nine rare missense mutations, in combinations forming 10 distinct haplotypes, in 13 families in which we could follow 17 independent transmission events where a heterozygous parent could transmit any of the rare haplotypes to an affected child. In 13 of these 17 events (independent under the null hypothesis), the rare allele was transmitted to the affected offspring ( $p = 0.029$ ) (Table 2). A list of the *MEFV* variants identified are shown in S3 Table. When the two cohorts were combined, a total of 12 rare mutations were identified (Table 2). In 30 of these 39 events, the rare allele was transmitted to the affected offspring ( $p = 0.008$ ). Furthermore, among the variants analyzed in *CCL11*, *CCL4*, and *MEFV*, the overlap is no more than the product of the individual frequencies (data not shown), suggesting each are independently associated with FM.

## Discussion

Although the cause of FM is unknown and there are no definitive laboratory tests, many patients report a triggering event such as trauma or a chronic inflammatory condition.

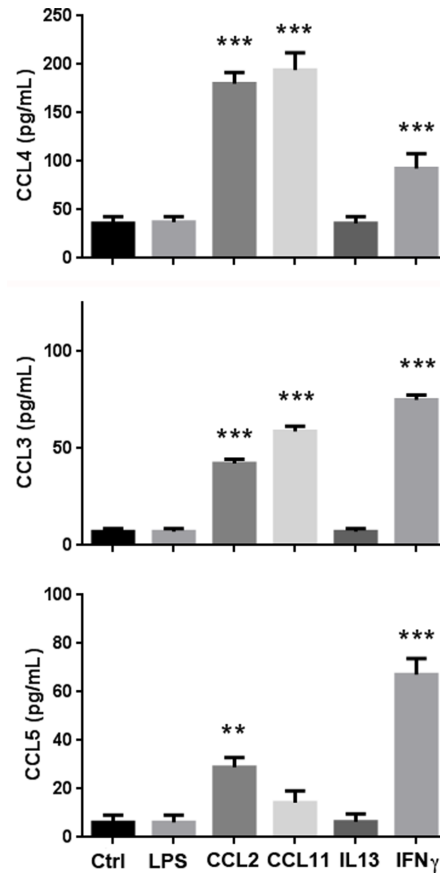

**Fig 5. Human skeletal muscles cells secrete CCL4, CCL3 and CCL5 after treatment with cytokines and chemokines.** Confluent skeletal muscle myoblasts were treated with LPS (10 ng/mL), CCL2 (20 nM), CCL11 (20 nM), IL-13 (20 nM) or IFN $\gamma$  (100 ng/mL) for 48hrs and cytokines levels were measured using cytokine multiplex analysis. Ctrl: untreated control, n = 4 (\*\* P<0.01, \*\*\* P<0.001 in comparison with controls).

<https://doi.org/10.1371/journal.pone.0198625.g005>

Trauma that causes sterile inflammation and chronic inflammation have in common the triggering of the immune response [34]. While high levels of chemokines have been reported in the blood [12] and CNS [35] of FM patients, the prevailing hypothesis centers on disturbances in pain pathways [36]. Given the high incidence within families, clues to its origin may lie in genetic analyses. Using a FM family GWAS that identified a region of chromosome 17 which included a cluster of 18 chemokine genes as a starting point, we tested the hypothesis that the pathogenesis of FM is immune-related. Out of four candidate SNPs in four chemokine genes, a variant allele in *CCL11* found in 36.8% of 220 FM cases had a statistically significant TDT ( $p = 0.0074$ ). Functional studies revealed that the resulting protein from the variant affected expression due to its location at the precise point of cleavage of the signal peptide from pre-pro-CCL11. Since CCL11 levels are statistically elevated in most FM patients, this result suggests that while the elevated expression of CCL11 is a common event, the inability to generate a robust CCL11 response predisposes up to 36% of patients with a higher likelihood of FM. While we have no obvious explanation of why this is the case, it may suggest that high expression of CCL11 in response to an inflammatory trigger is a compensatory feature of FM since the CCL11 SNP prevents a robust response. With further validation studies, it is possible that SNP analysis of rs1129844 in *CCL11* can be used as a risk factor for FM. This study provides

Table 2. Transmission analysis of MEFV in cohort of 120 fibromyalgia trios<sup>1</sup>.

| variant                 | proband         | mother          | father | transmitted  | untransmitted |
|-------------------------|-----------------|-----------------|--------|--------------|---------------|
| E148Q                   | FM647 het       | wt              | het    | 1            | 0             |
|                         | FM624 het       | het             | wt     | 1            | 0             |
| L110P/E148Q             | FM826 het       | het             | wt     | 1            | 0             |
|                         | FM835 wt        | wt              | het    | 0            | 1             |
| P369S/R408Q             | FM627 wt        | het             | wt     | 0            | 1             |
|                         | FM635 het       | wt              | het    | 1            | 0             |
|                         | FM688 het       | wt              | het    | 1            | 0             |
| L110P/E148Q/P369S       | FM887 het       | wt              | het    | 1            | 0             |
| E148Q/P369S/R408Q       | FM662 het       | wt              | het    | 1            | 0             |
| E526G                   | FM944 het       | het             | wt     | 1            | 0             |
| I591T                   | FM699 wt        | het             | wt     | 0            | 1             |
|                         | FM956 het       | wt              | het    | 1            | 0             |
|                         | FM739 het       | wt              | het    | 1            | 0             |
| K695R                   | FM699 wt        | het             | wt     | 0            | 1             |
|                         | FM956 het       | wt              | het    | 1            | 0             |
| V726A                   | FM841 het       | het             | wt     | 1            | 0             |
| A744S                   | FM736 het       | het             | wt     | 1            | 0             |
| Total                   |                 |                 |        | 13           | 4             |
|                         |                 |                 |        |              |               |
|                         | <b>Cohort 1</b> | <b>Cohort 2</b> |        | <b>Total</b> |               |
| <b>Number of trios</b>  | 100             | 120             |        | 220          |               |
| <b>Proband with SNP</b> | 15              | 13              |        | 28           |               |
| <b>Transmitted</b>      | 17              | 13              |        | 30           |               |
| <b>Not transmitted</b>  | 5               | 4               |        | 9            |               |
| <b>P value</b>          | 0.0085          | 0.029           |        | 0.008        |               |

1 Upper: The size of the cohort was 120 trios (wt = wild type, het = heterozygous). Lower: Combined cohorts of 100 trios previously reported together with new cohort of 120 (var = variant SNP).

<https://doi.org/10.1371/journal.pone.0198625.t002>

evidence that rs1129844 in *CCL11* may be a useful marker for FM and that the high frequency of this SNP in FM patients (36.8%) argues for an underlying immune connection.

While SNP rs1719152 in *CCL4* failed to give a positive TDT and may not be causal, additional functional studies demonstrated the induction of *CCL4* from skeletal muscle cells treated with *CCL11*, perhaps explaining a cause and effect relationship between the two chemokines at the level of skeletal muscle. *CCL4* has long been associated with neuropathic pain [37], while muscle pain in fibromyalgia is associated with high levels of the related chemokine *CCL2* [12, 38, 39]. The further observation that down-regulation of *CCR5*, the cognate receptor for *CCL4*, causes hypotension is an interesting correlation, since many FM patients report episodes of orthostatic hypotension [28, 40]. We speculate that there is a relationship between *CCL11* and *CCL4* in FM that may account for symptomology.

If a chronic inflammatory condition, whether sterile or due to a chronic condition such as IBS, is a trigger for FM, then chronic activation of the immune system may account for many of the symptoms. In earlier work, we speculated that the inflammasome, known to be triggered by both PAMPs and DAMPs [33], may be chronically activated in FM patients with causative SNPs in the *MEFV* gene. While periodic fevers require causative SNPs on both alleles of *MEFV*, we speculated that a SNP on one allele may lead to activation of the inflammasome in the presence of other environmental factors. Since our current study involved a second cohort

of 100 FM families, there was an opportunity to reexamine the contribution of *MEFV* SNPs to FM. Not unexpectedly, we found a significant TDT in the second cohort ( $p = 0.012$ ), and when combined an overall TDT with  $p = 0.008$ . Since only 12% of the combined cohort had *MEFV* SNPs, we conclude that the different aspects of the immune system may contribute to common symptoms in FM, suggesting that different genetic tests with appropriate approaches to treatment may be warranted.

In summary, we present evidence at both the genetic and functional level that the immune system may be involved in FM in roughly half of a cohort of 220 FM patients for which SNPs in *CCL11* and *MEFV* gave significant TDTs. Considering that activation of the immune system is often associated with neurological systems such as pain, the involvement of the immune system in FM does not rule out the prevailing hypothesis that FM is predominantly a pain syndrome. With this in mind, further studies on larger number of patients may help to validate the link between pain and the immune system in FM.

## Supporting information

**S1 Table. SNPs in chromosome 17 (17p13.3 to 17q25.3) found in 10% or more of a fibromyalgia cohort of 100.**

(DOCX)

**S2 Table. Transmission analysis of CCL11 variant -146 C>T in 120 FM trios.**

(DOCX)

**S3 Table. MEFV SNPs identified in 220 fibromyalgia probands.**

(DOCX)

**S1 Fig. Example of sequence analysis of a FM patient heterozygous for rs1129844 on CCL11.**

(DOCX)

**S2 Fig. Protein size profiles of wild type CCL4 and varCCL4.**

(DOCX)

## Acknowledgments

We thank Lin Li and Patty Wong in our lab for technical support and Analytical Cytometry Core for calcium mobilization analysis.

## Author Contributions

**Conceptualization:** Zhifang Zhang, John E. Shively.

**Data curation:** Xiwei Wu.

**Formal analysis:** Zhifang Zhang, Jinong Feng, Allen Mao, Keith Le, Xiwei Wu, Jeffrey Longmate, Susan L. Neuhausen, John E. Shively.

**Investigation:** Allen Mao, Keith Le, Deirdre La Placa, Claudia Marek, R. Paul St. Amand, John E. Shively.

**Methodology:** Zhifang Zhang, Jinong Feng, John E. Shively.

**Resources:** Claudia Marek, R. Paul St. Amand.

**Supervision:** John E. Shively.

**Writing – original draft:** Zhifang Zhang, John E. Shively.



**Writing – review & editing:** Zhifang Zhang, Jinong Feng, Jeffrey Longmate, Claudia Marek, R. Paul St. Amand, Susan L. Neuhausen, John E. Shively.

## References

1. Wolfe F, Ross K, Anderson J, Russell IJ, Hebert L. The prevalence and characteristics of fibromyalgia in the general population. *Arthritis Rheum.* 1995; 38(1):19–28. PMID: [7818567](#).
2. Dadabhoy D, Crofford LJ, Spaeth M, Russell IJ, Clauw DJ. Biology and therapy of fibromyalgia. Evidence-based biomarkers for fibromyalgia syndrome. *Arthritis Res Ther.* 2008; 10(4):211. <https://doi.org/10.1186/ar2443> PMID: [18768089](#); PubMed Central PMCID: [PMC2575617](#).
3. Wolfe F, Cathey MA. Assessment of functional ability in patients with fibromyalgia. *Arch Intern Med.* 1990; 150(2):460. PMID: [2302023](#).
4. Sperber AD, Atzmon Y, Neumann L, Weisberg I, Shalit Y, Abu-Shakrah M, et al. Fibromyalgia in the irritable bowel syndrome: studies of prevalence and clinical implications. *Am J Gastroenterol.* 1999; 94(12):3541–6. <https://doi.org/10.1111/j.1572-0241.1999.01643.x> PMID: [10606316](#).
5. Buskila D, Sarzi-Puttini P, Ablin JN. The genetics of fibromyalgia syndrome. *Pharmacogenomics.* 2007; 8(1):67–74. <https://doi.org/10.2217/14622416.8.1.67> PMID: [17187510](#).
6. Arnold LM, Fan J, Russell IJ, Yunus MB, Khan MA, Kushner I, et al. The fibromyalgia family study: a genome-wide linkage scan study. *Arthritis Rheum.* 2013; 65(4):1122–8. <https://doi.org/10.1002/art.37842> PMID: [23280346](#); PubMed Central PMCID: [PMC3618544](#).
7. Jones KD, Gelbart T, Whisenant TC, Waalen J, Mondala TS, Ikle DN, et al. Genome-wide expression profiling in the peripheral blood of patients with fibromyalgia. *Clin Exp Rheumatol.* 2016; 34(2 Suppl 96): S89–98. PMID: [27157394](#); PubMed Central PMCID: [PMC4888802](#).
8. Bondy B, Spaeth M, Offenbaecher M, Glatzeder K, Stratz T, Schwarz M, et al. The T102C polymorphism of the 5-HT2A-receptor gene in fibromyalgia. *Neurobiol Dis.* 1999; 6(5):433–9. <https://doi.org/10.1006/nbdi.1999.0262> PMID: [10527809](#).
9. Kato K, Sullivan PF, Evengard B, Pedersen NL. Importance of genetic influences on chronic widespread pain. *Arthritis Rheum.* 2006; 54(5):1682–6. <https://doi.org/10.1002/art.21798> PMID: [16646040](#).
10. Buskila D, Cohen H, Neumann L, Ebsstein RP. An association between fibromyalgia and the dopamine D4 receptor exon III repeat polymorphism and relationship to novelty seeking personality traits. *Mol Psychiatry.* 2004; 9(8):730–1. <https://doi.org/10.1038/sj.mp.4001506> PMID: [15052273](#).
11. Docampo E, Escaramis G, Gratacos M, Villatoro S, Puig A, Kogevinas M, et al. Genome-wide analysis of single nucleotide polymorphisms and copy number variants in fibromyalgia suggest a role for the central nervous system. *Pain.* 2014; 155(6):1102–9. <https://doi.org/10.1016/j.pain.2014.02.016> PMID: [24582949](#).
12. Zhang Z, Cherryholmes G, Mao A, Marek C, Longmate J, Kalos M, et al. High plasma levels of MCP-1 and eotaxin provide evidence for an immunological basis of fibromyalgia. *Exp Biol Med (Maywood).* 2008; 233(9):1171–80. <https://doi.org/10.3181/0712-RM-328> PMID: [18535166](#).
13. Feng J, Zhang Z, Li W, Shen X, Song W, Yang C, et al. Missense mutations in the MEFV gene are associated with fibromyalgia syndrome and correlate with elevated IL-1beta plasma levels. *PLoS One.* 2009; 4(12):e8480. Epub 2009/12/31. <https://doi.org/10.1371/journal.pone.0008480> PMID: [20041150](#); PubMed Central PMCID: [PMC2794536](#).
14. Behm FG, Gavin IM, Karpenko O, Lindgren V, Gaitonde S, Gashkoff PA, et al. Unique immunologic patterns in fibromyalgia. *BMC Clin Pathol.* 2012; 12:25. Epub 2012/12/19. <https://doi.org/10.1186/1472-6890-12-25> PMID: [23245186](#); PubMed Central PMCID: [PMC3534336](#).
15. Rigoli L, Caminiti L, Di Bella C, Procopio V, Cuppari C, Vita D, et al. Investigation of the eotaxin gene -426C→T, -384A→G and 67G→a single-nucleotide polymorphisms and atopic dermatitis in Italian children using family-based association methods. *Clin Exp Dermatol.* 2008; 33(3):316–21. <https://doi.org/10.1111/j.1365-2230.2007.02672.x> PMID: [18312459](#).
16. Imielinski M, Baldassano RN, Griffiths A, Russell RK, Annesse V, Dubinsky M, et al. Common variants at five new loci associated with early-onset inflammatory bowel disease. *Nat Genet.* 2009; 41(12):1335–40. <https://doi.org/10.1038/ng.489> PMID: [19915574](#); PubMed Central PMCID: [PMC3267927](#).
17. Manukyan G, Aminov R. Update on Pylrin Functions and Mechanisms of Familial Mediterranean Fever. *Front Microbiol.* 2016; 7:456. <https://doi.org/10.3389/fmicb.2016.00456> PMID: [27066000](#); PubMed Central PMCID: [PMC4815028](#).
18. Karakus N, Yigit S, Inanir A, Inanir S, Toprak H, Okan S. Association between sequence variations of the Mediterranean fever gene and fibromyalgia syndrome in a cohort of Turkish patients. *Clin Chim Acta.* 2012; 414:36–40. <https://doi.org/10.1016/j.cca.2012.07.019> PMID: [23010357](#).

19. Wolfe F. New American College of Rheumatology criteria for fibromyalgia: a twenty-year journey. *Arthritis Care Res (Hoboken)*. 2010; 62(5):583–4. Epub 2010/05/13. <https://doi.org/10.1002/acr.20156> PMID: 20461781.
20. Zlotnik A, Yoshie O. The chemokine superfamily revisited. *Immunity*. 2012; 36(5):705–16. <https://doi.org/10.1016/j.immuni.2012.05.008> PMID: 22633458; PubMed Central PMCID: PMC3396424.
21. Lek M, Karczewski KJ, Minikel EV, Samocha KE, Banks E, Fennell T, et al. Analysis of protein-coding genetic variation in 60,706 humans. *Nature*. 2016; 536(7616):285–91. <https://doi.org/10.1038/nature19057> PMID: 27535533; PubMed Central PMCID: PMC5018207.
22. Gonzalez B, Baptista TM, Branco JC, Ferreira AS. Fibromyalgia: antecedent life events, disability, and causal attribution. *Psychology, health & medicine*. 2013; 18(4):461–70. <https://doi.org/10.1080/13548506.2012.752098> PMID: 23323642.
23. Singh P, Arora S, Lal S, Strand TA, Makharia GK. Risk of Celiac Disease in the First- and Second-Degree Relatives of Patients With Celiac Disease: A Systematic Review and Meta-Analysis. *Am J Gastroenterol*. 2015; 110(11):1539–48. <https://doi.org/10.1038/ajg.2015.296> PMID: 26416192.
24. Ito M, Oiso Y, Murase T, Kondo K, Saito H, Chinzei T, et al. Possible involvement of inefficient cleavage of preprovasopressin by signal peptidase as a cause for familial central diabetes insipidus. *J Clin Invest*. 1993; 91(6):2565–71. <https://doi.org/10.1172/JCI116494> PMID: 8514868; PubMed Central PMCID: PMCPMC443319.
25. Cui J, Chen W, Sun J, Guo H, Madley R, Xiong Y, et al. Competitive Inhibition of the Endoplasmic Reticulum Signal Peptidase by Non-cleavable Mutant Preprotein Cargos. *J Biol Chem*. 2015; 290(47):28131–40. <https://doi.org/10.1074/jbc.M115.692350> PMID: 26446786; PubMed Central PMCID: PMCPMC4653672.
26. Noso N, Bartels J, Mallet AI, Mochizuki M, Christophers E, Schroder JM. Delayed production of biologically active O-glycosylated forms of human eotaxin by tumor-necrosis-factor-alpha-stimulated dermal fibroblasts. *European journal of biochemistry*. 1998; 253(1):114–22. PMID: 9578468.
27. Scholz J, Woolf CJ. The neuropathic pain triad: neurons, immune cells and glia. *Nat Neurosci*. 2007; 10(11):1361–8. <https://doi.org/10.1038/nn1992> PMID: 17965656.
28. Bou-Holaigah I, Calkins H, Flynn JA, Tunin C, Chang HC, Kan JS, et al. Provocation of hypotension and pain during upright tilt table testing in adults with fibromyalgia. *Clin Exp Rheumatol*. 1997; 15(3):239–46. PMID: 9177917.
29. Lieberman-Blum SS, Fung HB, Bandres JC. Maraviroc: a CCR5-receptor antagonist for the treatment of HIV-1 infection. *Clin Ther*. 2008; 30(7):1228–50. PMID: 18691983.
30. Ren M, Guo Q, Guo L, Lenz M, Qian F, Koenen RR, et al. Polymerization of MIP-1 chemokine (CCL3 and CCL4) and clearance of MIP-1 by insulin-degrading enzyme. *EMBO J*. 2010; 29(23):3952–66. <https://doi.org/10.1038/emboj.2010.256> PMID: 20959807; PubMed Central PMCID: PMCPMC3020635.
31. Liang WG, Ren M, Zhao F, Tang WJ. Structures of human CCL18, CCL3, and CCL4 reveal molecular determinants for quaternary structures and sensitivity to insulin-degrading enzyme. *J Mol Biol*. 2015; 427(6 Pt B):1345–58. <https://doi.org/10.1016/j.jmb.2015.01.012> PMID: 25636406; PubMed Central PMCID: PMCPMC4355285.
32. Lee B, Sharron M, Montaner LJ, Weissman D, Doms RW. Quantification of CD4, CCR5, and CXCR4 levels on lymphocyte subsets, dendritic cells, and differentially conditioned monocyte-derived macrophages. *Proc Natl Acad Sci U S A*. 1999; 96(9):5215–20. PMID: 10220446; PubMed Central PMCID: PMCPMC21844.
33. de Torre-Minguela C, Mesa Del Castillo P, Pelegrin P. The NLRP3 and Pyrin Inflammasomes: Implications in the Pathophysiology of Autoinflammatory Diseases. *Frontiers in immunology*. 2017; 8:43. <https://doi.org/10.3389/fimmu.2017.00043> PMID: 28191008; PubMed Central PMCID: PMC5271383.
34. Chen GY, Nunez G. Sterile inflammation: sensing and reacting to damage. *Nat Rev Immunol*. 2010; 10(12):826–37. <https://doi.org/10.1038/nri2873> PMID: 21088683; PubMed Central PMCID: PMCPMC3114424.
35. Kosek E, Altawil R, Kadetoff D, Finn A, Westman M, Le Maitre E, et al. Evidence of different mediators of central inflammation in dysfunctional and inflammatory pain—interleukin-8 in fibromyalgia and interleukin-1 beta in rheumatoid arthritis. *J Neuroimmunol*. 2015; 280:49–55. <https://doi.org/10.1016/j.jneuroim.2015.02.002> PMID: 25773155; PubMed Central PMCID: PMCPMC4372266.
36. Clauw DJ. Fibromyalgia and related conditions. *Mayo Clin Proc*. 2015; 90(5):680–92. <https://doi.org/10.1016/j.mayocp.2015.03.014> PMID: 25939940.
37. Saika F, Kiguchi N, Kobayashi Y, Fukazawa Y, Kishioka S. CC-chemokine ligand 4/macrophage inflammatory protein-1beta participates in the induction of neuropathic pain after peripheral nerve injury. *Eur J Pain*. 2012; 16(9):1271–80. <https://doi.org/10.1002/j.1532-2149.2012.00146.x> PMID: 22528550.

38. Ang DC, Moore MN, Hilligoss J, Tabbey R. MCP-1 and IL-8 as pain biomarkers in fibromyalgia: a pilot study. *Pain Med.* 2011; 12(8):1154–61. <https://doi.org/10.1111/j.1526-4637.2011.01179.x> PMID: [21714842](https://pubmed.ncbi.nlm.nih.gov/21714842/).
39. Bote ME, Garcia JJ, Hinchado MD, Ortega E. Inflammatory/stress feedback dysregulation in women with fibromyalgia. *Neuroimmunomodulation.* 2012; 19(6):343–51. <https://doi.org/10.1159/000341664> PMID: [22986514](https://pubmed.ncbi.nlm.nih.gov/22986514/).
40. Staud R. Autonomic dysfunction in fibromyalgia syndrome: postural orthostatic tachycardia. *Curr Rheumatol Rep.* 2008; 10(6):463–6. PMID: [19007537](https://pubmed.ncbi.nlm.nih.gov/19007537/).
